# Supplementary material for: Synthesis, biological and electrochemical evaluation of glycidyl esters of phosphorus acids as potential anticancer drugs
Source: publisher site journal article supplement (doi:10.3762/bjoc.21.148), 2025-09-15
Supplement: Additional file 1 [file 1860-5397-21-148-S1.pdf]

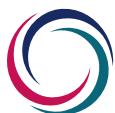

## Supporting Information

for

### Synthesis, biological and electrochemical evaluation of glycidyl esters of phosphorus acids as potential anticancer drugs

Almaz A. Zagidullin, Emil R. Bulatov, Mikhail N. Khrizanforov, Damir R. Davletshin, Elvina M. Gilyazova, Ivan A. Strelkov and Vasily A. Miluykov

*Beilstein J. Org. Chem.* **2025**, *21*, 1909–1916. doi:10.3762/bjoc.21.148

### $^1\text{H}$ , $^{31}\text{P}$ NMR and IR spectra of compounds 1–3

**$^{31}\text{P}$ ,  $^1\text{H}$  NMR, IR spectra for diglycidyl methylphosphonate (1).**

SpinWorks 4: zag

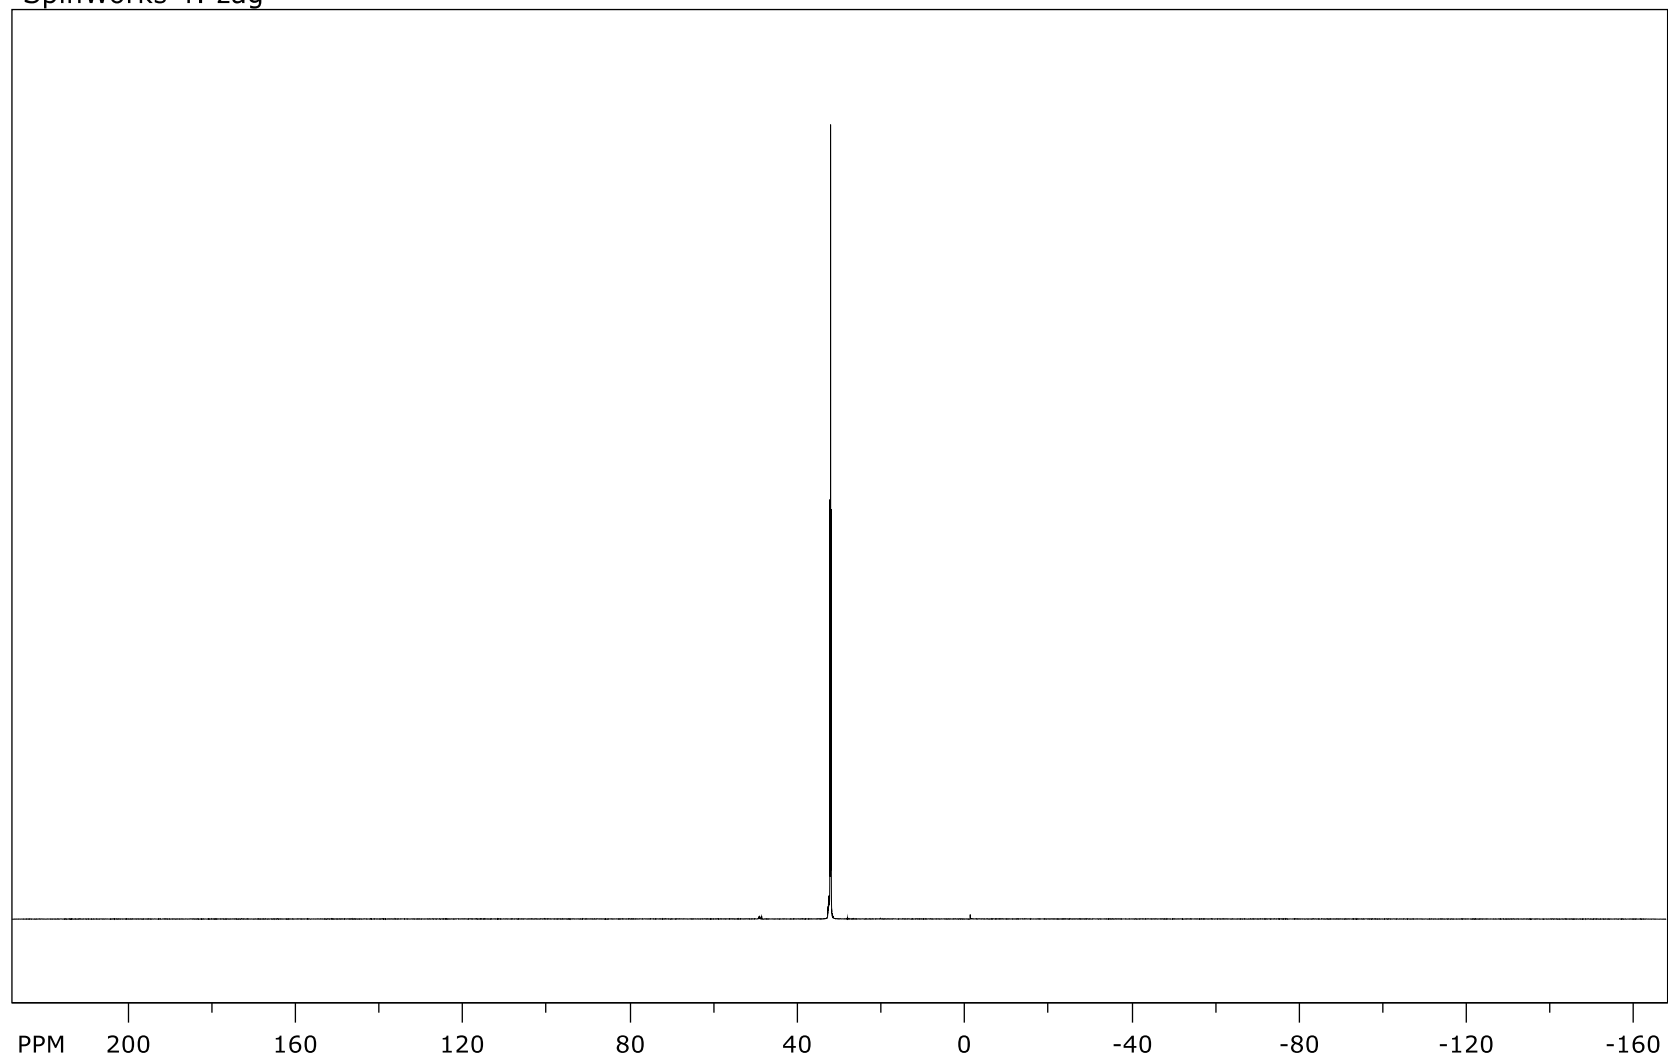

**Figure S1.**  $^{31}\text{P}\{^1\text{H}\}$  NMR spectrum of **1** in  $\text{CDCl}_3$ .

SpinWorks 4: zag

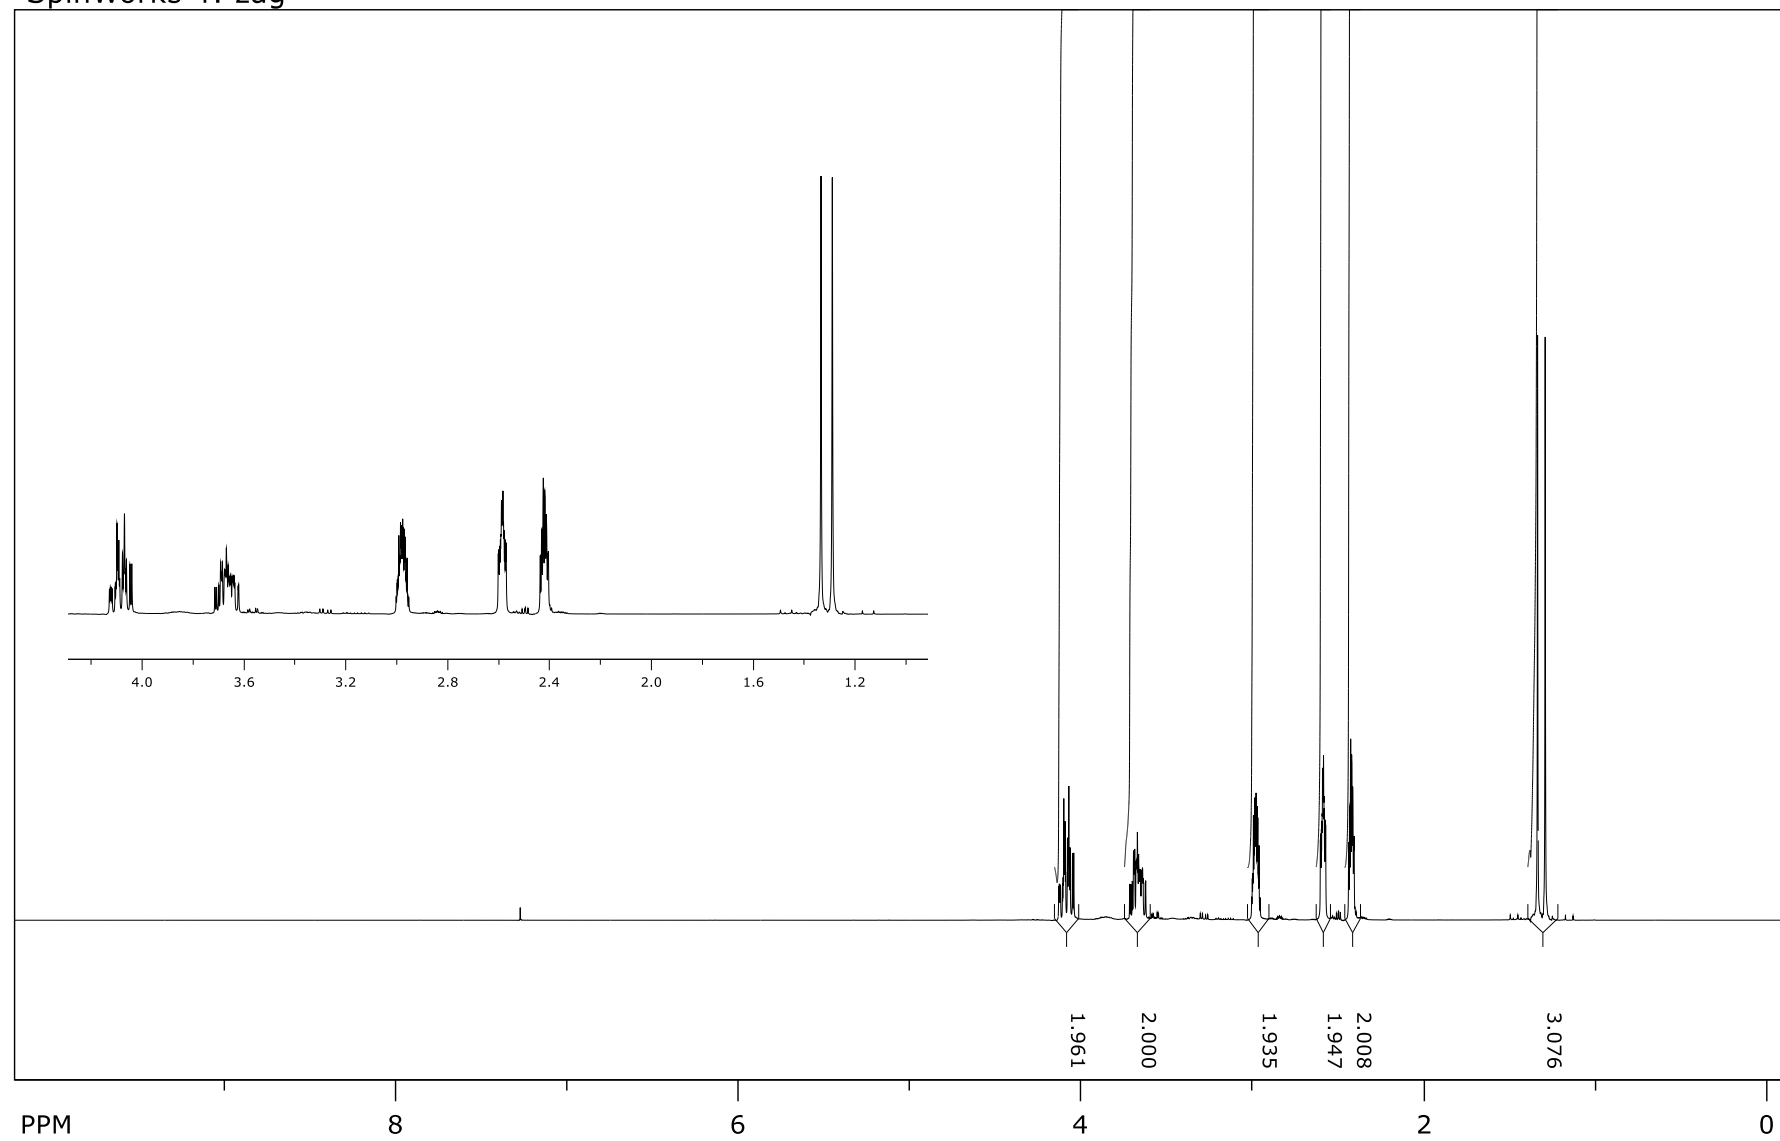

**Figure S2.**  $^1\text{H}$  NMR spectrum of **1** in  $\text{CDCl}_3$ .

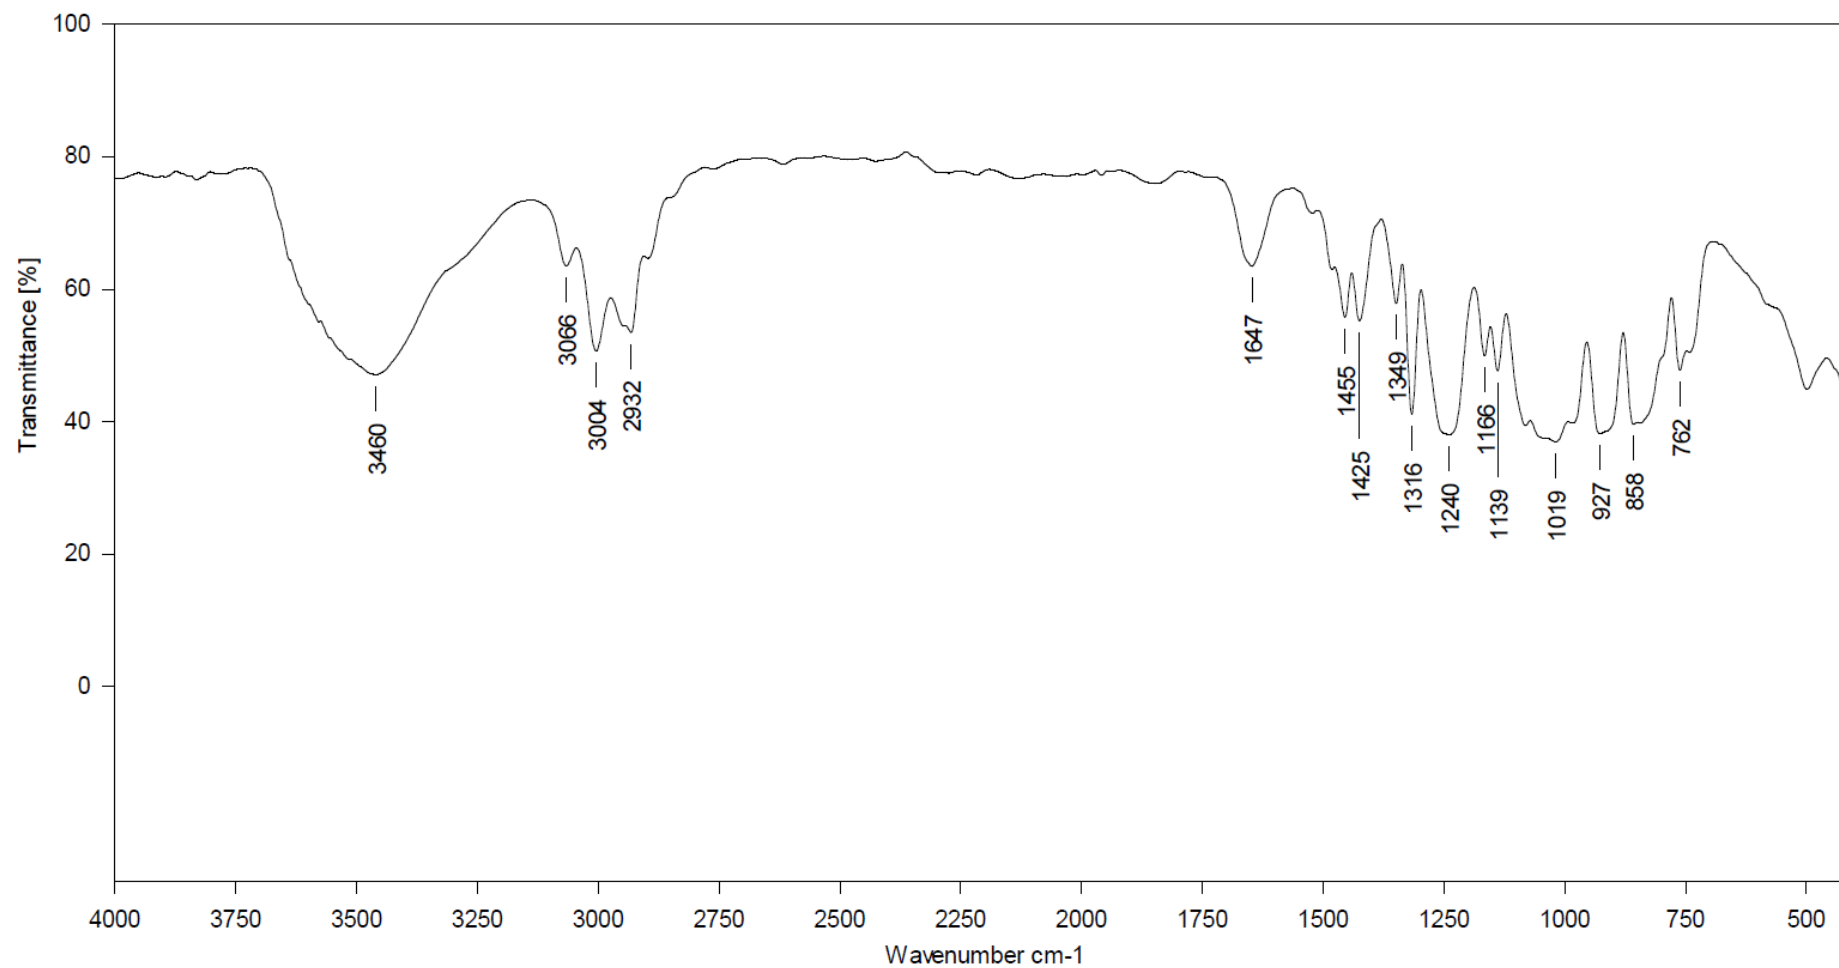

**Figure S3.** IR spectrum of **1** in CDCl<sub>3</sub>.

**$^{31}\text{P}$ ,  $^1\text{H}$  NMR, IR spectra for diglycidyl methylphosphate (2).**

SpinWorks 4: 31P BB zag

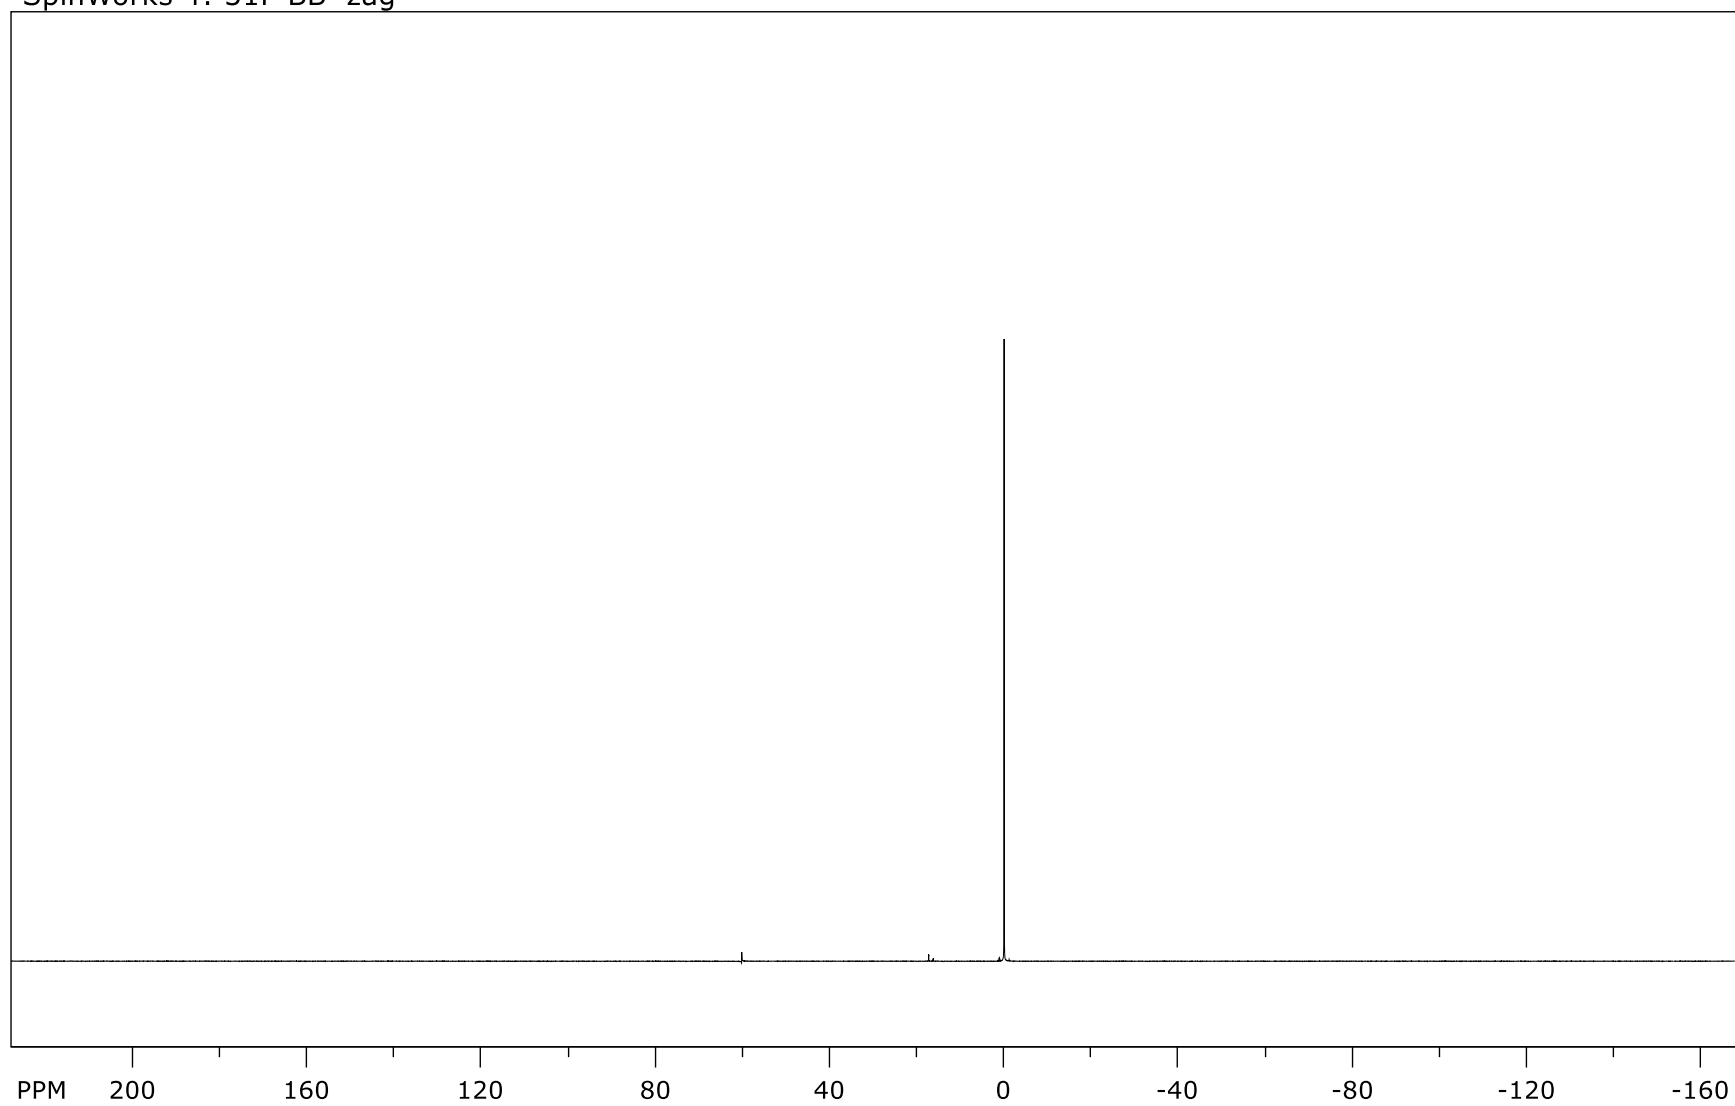

**Figure S4.**  $^{31}\text{P}\{^1\text{H}\}$  NMR spectrum of **2** in  $\text{CDCl}_3$ .

SpinWorks 4: 1H zag

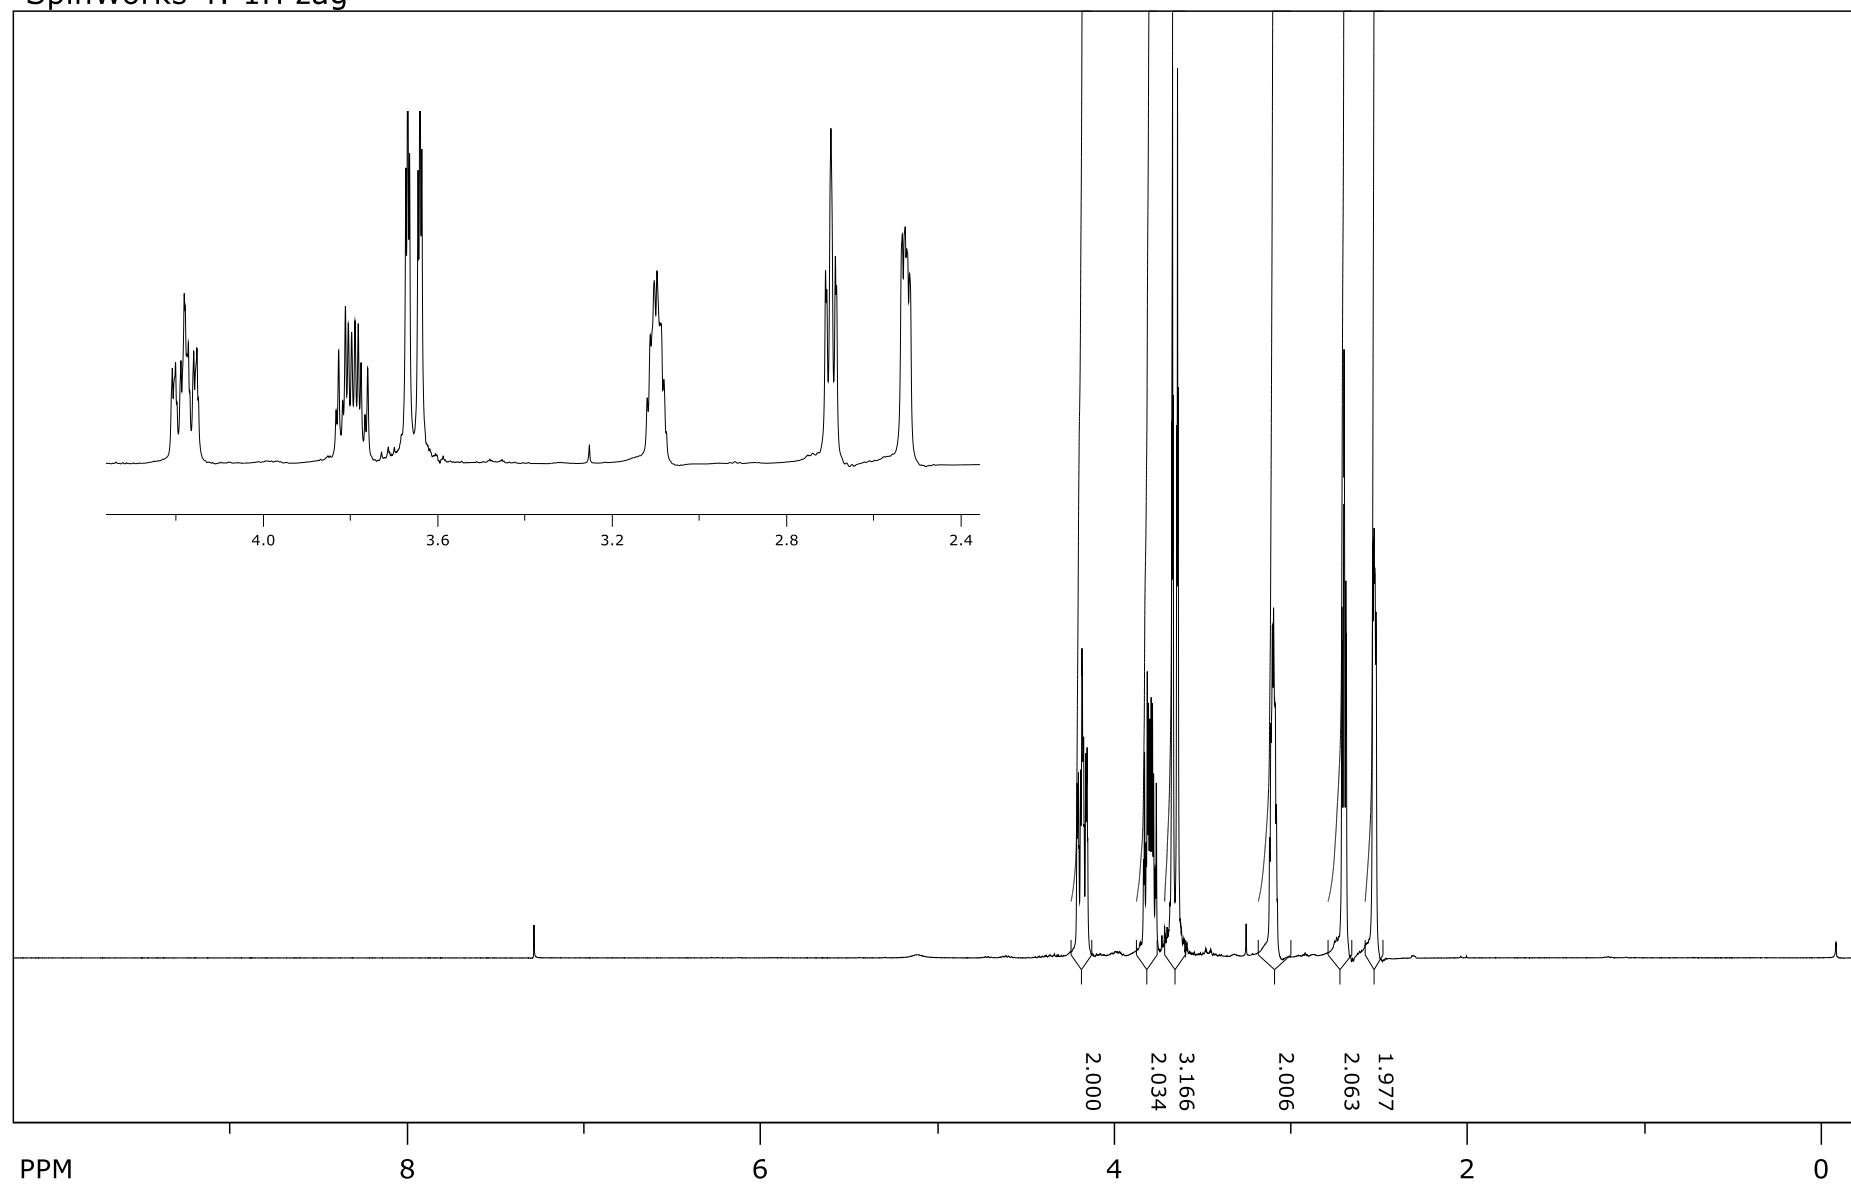

**Figure S5.**  $^1\text{H}$  NMR spectrum of **2** in  $\text{CDCl}_3$ .

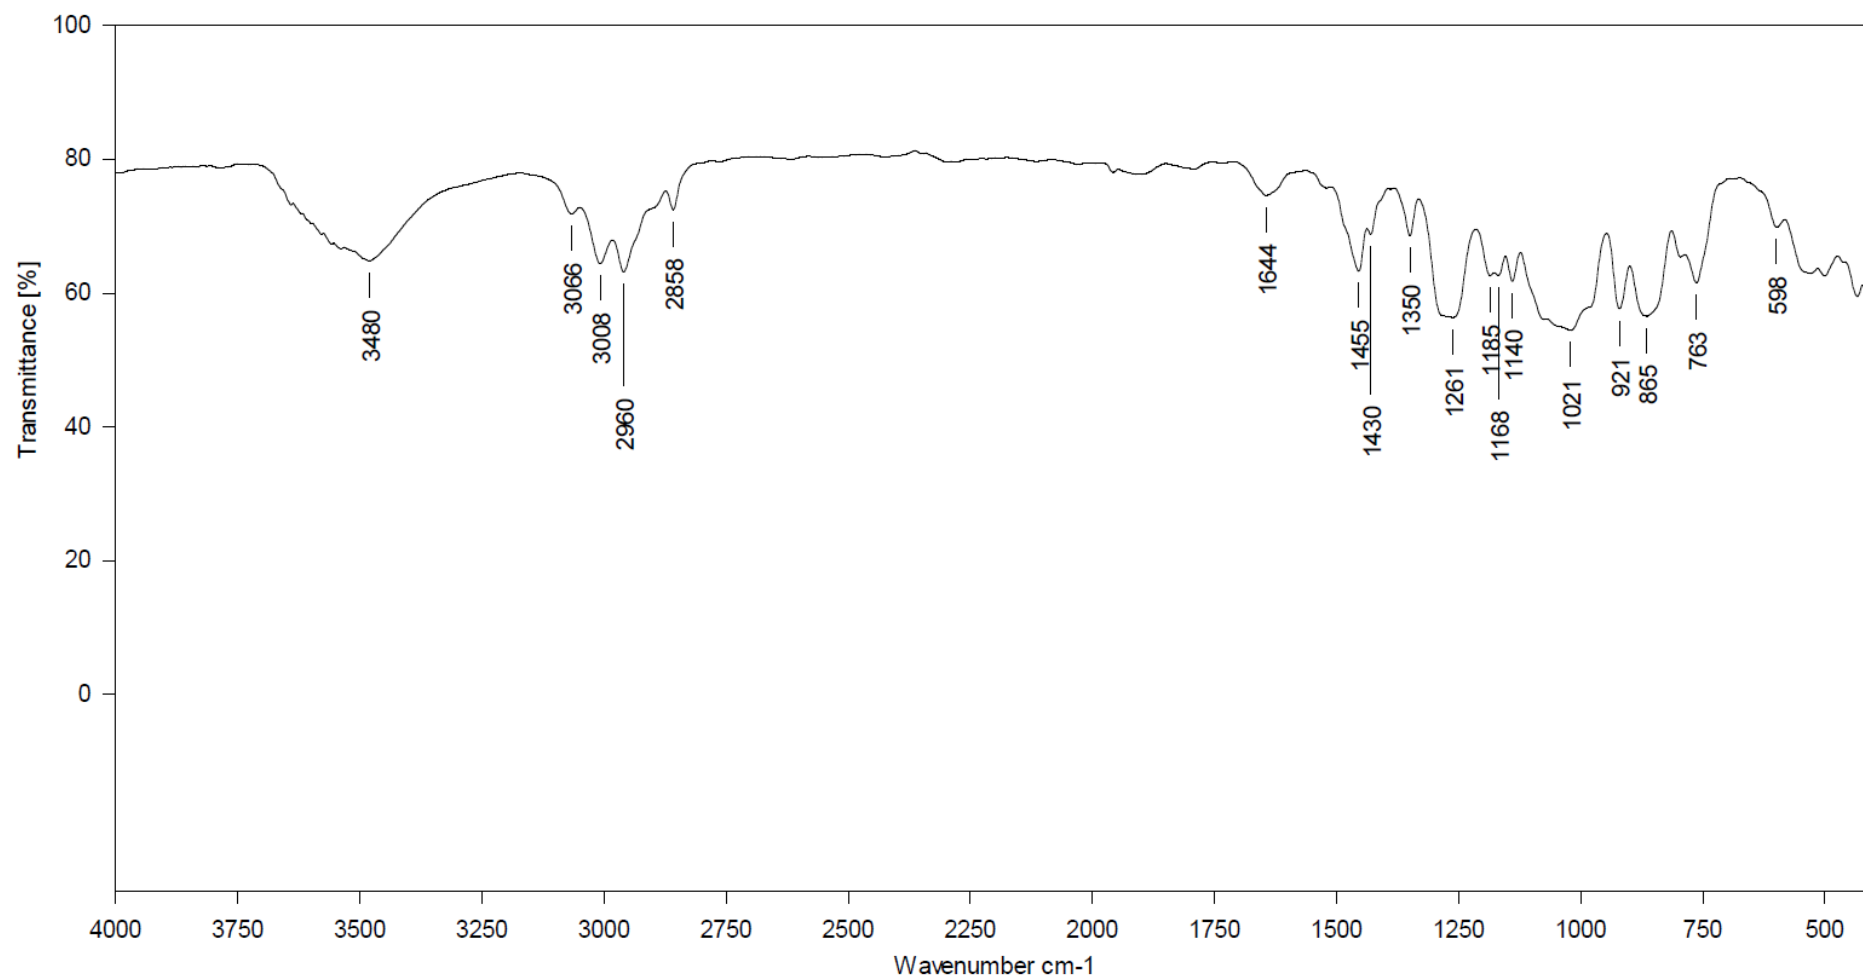

**Figure S6.** IR spectrum of **2**.

**$^{31}\text{P}$ ,  $^1\text{H}$  NMR, IR spectra for triglycidyl phosphate (3).**

SpinWorks 4: 31P BB zag

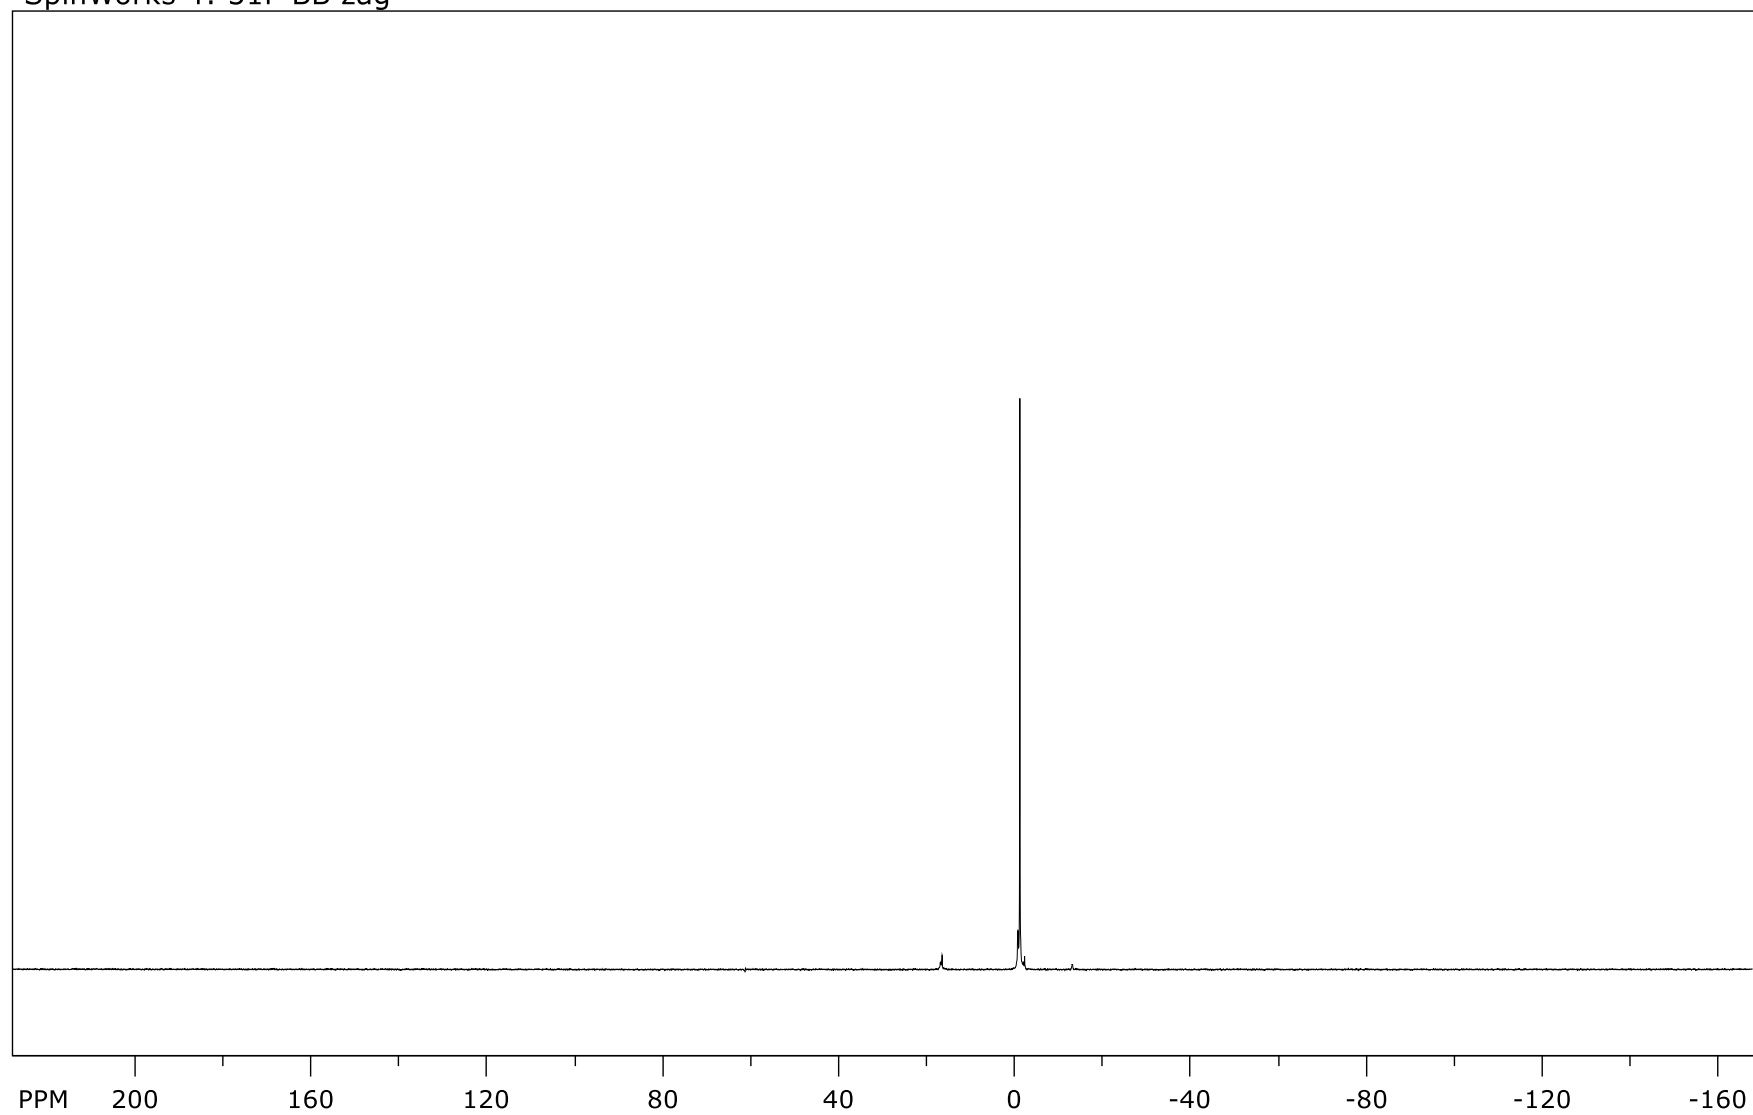

**Figure S7.**  $^{31}\text{P}\{^1\text{H}\}$  NMR spectrum of **3** in  $\text{CDCl}_3$ .



SpinWorks 4: 1H zag

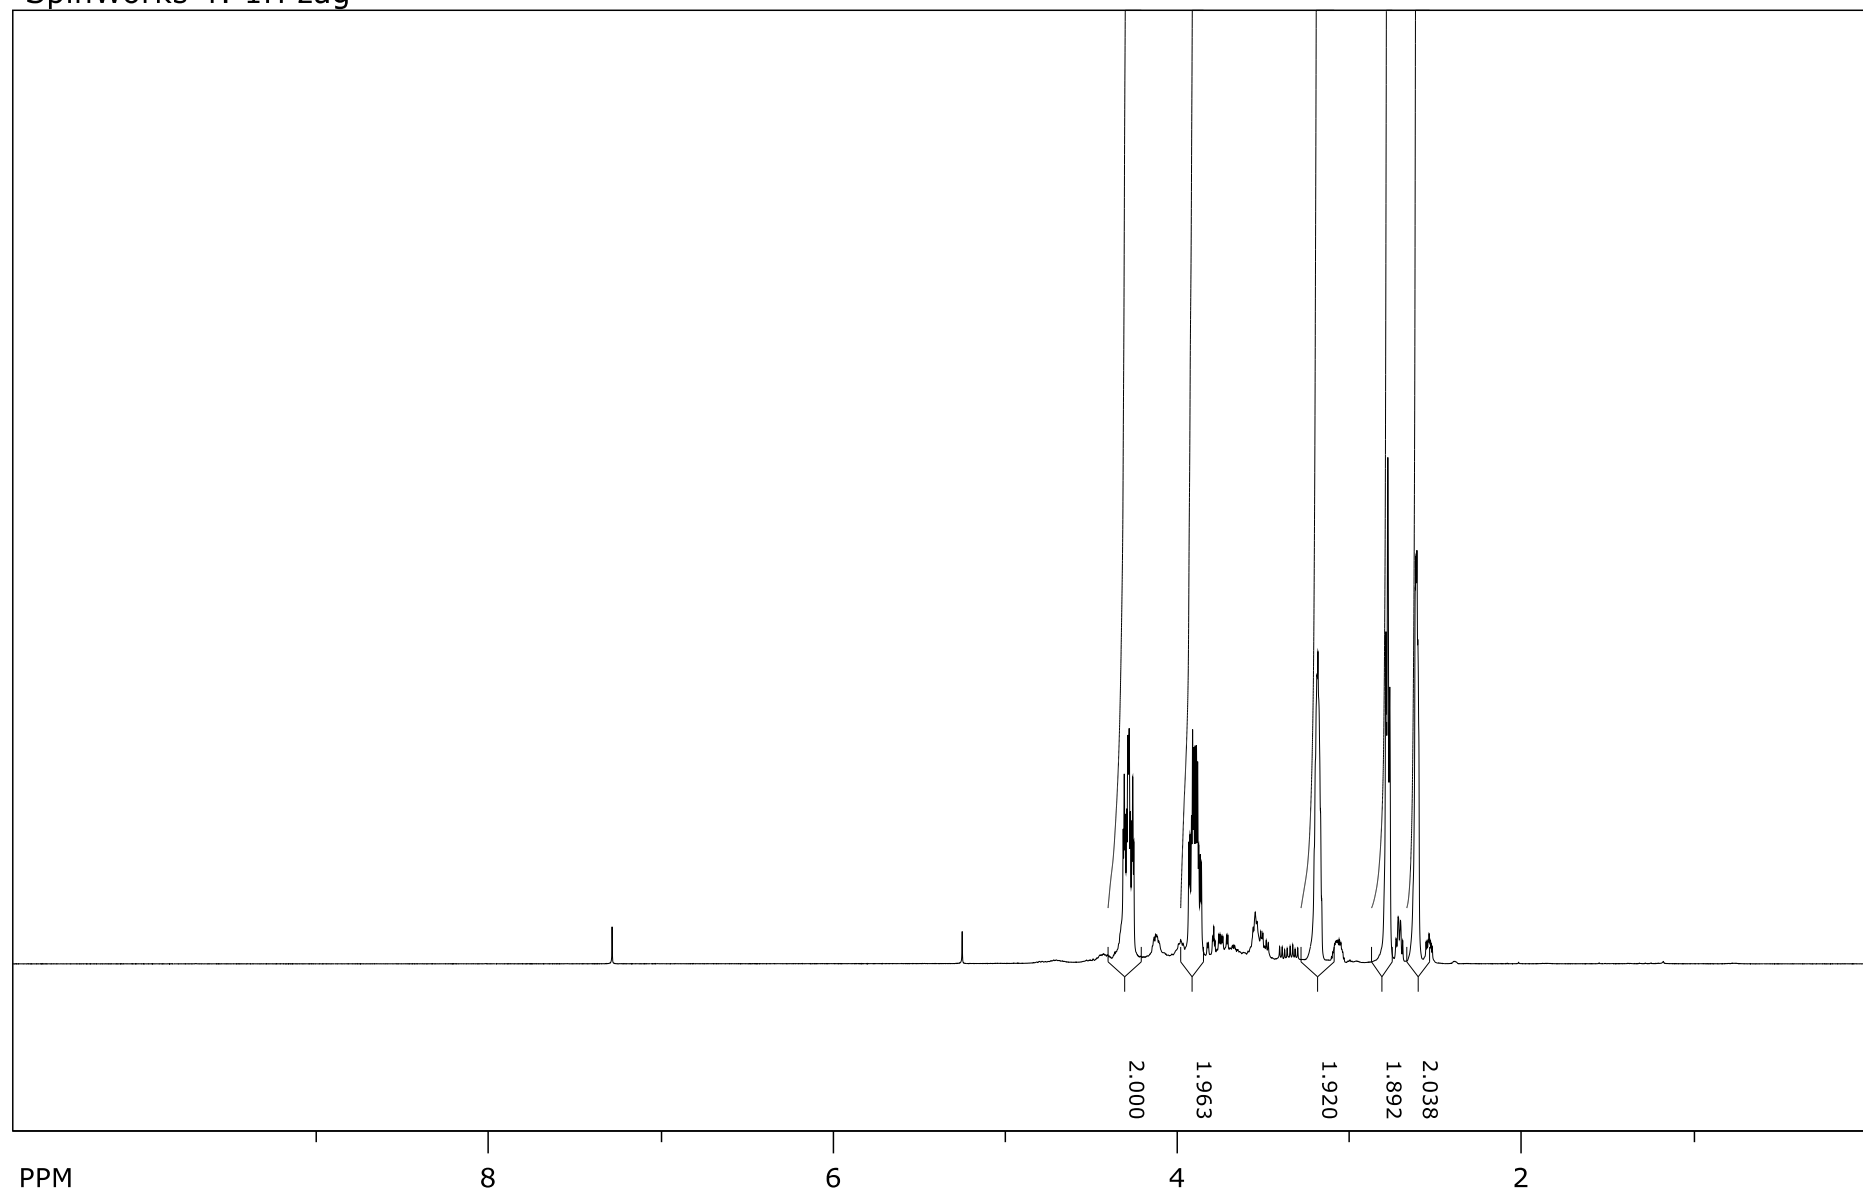

**Figure S8.**  $^1\text{H}$  NMR spectrum of **3** in  $\text{CDCl}_3$ .

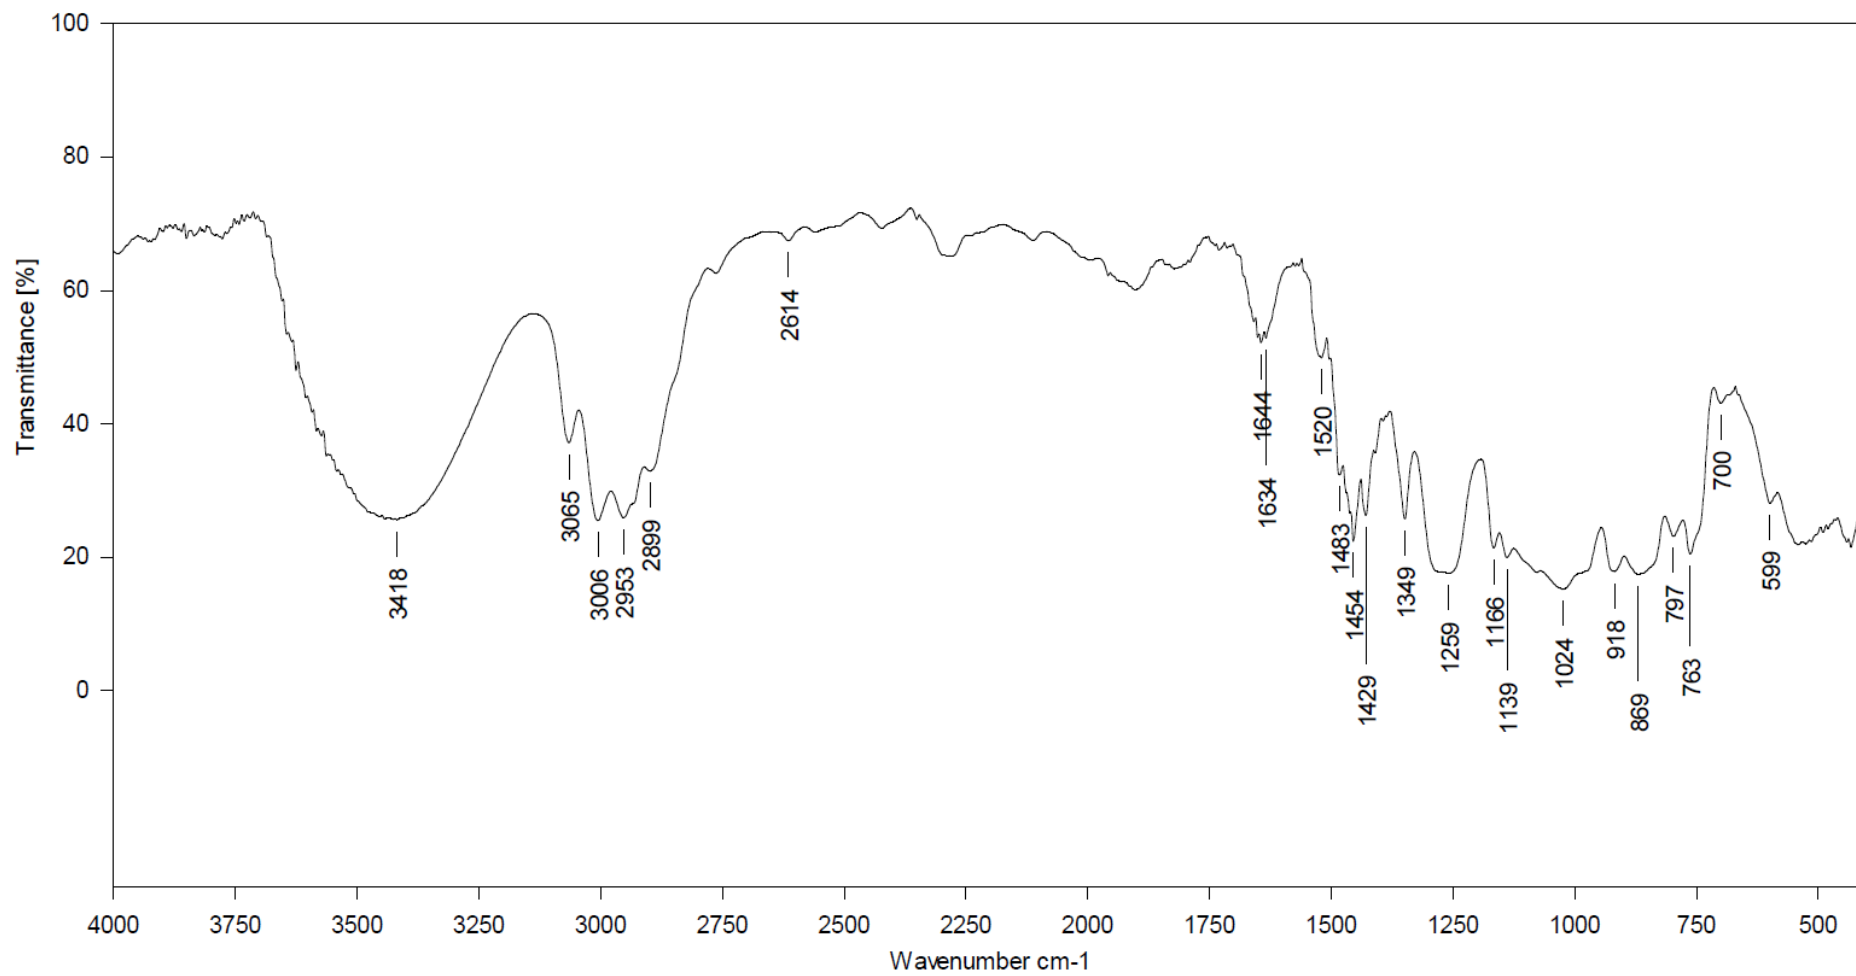

**Figure S9.** IR spectrum of **3**.
